# Supplementary material for: Higher-order unimodal olfactory sensory preconditioning in Drosophila
Source: eLife. 2022 Sep 21;11:e79107. doi: 10.7554/eLife.79107 (PMC9566850; doi:10.7554/eLife.79107)
Supplement: Figure 1—figure supplement 1—source data 1. [file elife-79107-fig1-figsupp1-data1.xlsx]

## Sheet: Control_MCH_CS+
MCH		OCT
Pre	Post	Pre	Post
0.632324	0.131411	0.988586	0.739856
1.32321	0.883378	1.43423	0.51437
0.489023	0.11642	0.913928	1.10387
1.07993	0.126565	0.922788	1.13241
0.838292	0.0325803	1.99838	1.62912
0.423421	0.354009	2.55879	2.03047
0.480924	0.198095	2.23038	1.84165
0.673923	0.124322	1.24653	1.02681
0.480302	0.324321	1.08028	1.6873
1.24949	0.180032	0.49232	0.592571
0.832342	0.456232	0.882455	1.09314
DATA WAS MULTIPLIED BY 100 TO PRESENT DATA AS %ΔF/Fo

## Sheet: Rac1N17_MCH_CS+
MCH		OCT
Pre	Post	Pre	Post
0.678923	0.16275	0.754999	0.115183
0.568923	0.549777	1.13465	-0.0308215
0.896382	0.133977	0.408105	0.556668
1.2399	0.208219	1.56617	0.770409
0.979302	0.046091	0.919305	0.251771
0.837893	0.18051	0.812418	0.835213
1.53219	0.205806	0.709831	0.205374
0.892423	0.143433	1.21223	0.249141
0.578434	0.249925	0.832932	0.537073
0.932342	0.349923	1.43249	0.86842
DATA WAS MULTIPLIED BY 100 TO PRESENT DATA AS %ΔF/Fo
