# Supplementary material for: Higher-order unimodal olfactory sensory preconditioning in Drosophila
Source: eLife. 2022 Sep 21;11:e79107. doi: 10.7554/eLife.79107 (PMC9566850; doi:10.7554/eLife.79107)
Supplement: Figure 1—source data 1. [file elife-79107-fig1-data1.xlsx]

## Sheet: Control_MCH_CS+_(1s ISI)
MCH		OCT		PA		EL
Backwards	Forward	Backwards	Forward	Backwards	Forward	Backwards	Forward
1.59821	0.0293383	2.11157	0.734136	2.69827	1.37113	2.35026	0.934608
0.776638	0.304612	1.28099	1.31343	0.897825	1.54309	1.5769	1.99273
1.45533	0.144455	1.45457	0.480205	1.1157	1.10258	1.67361	1.63477
0.573384	0.0124833	0.981306	0.500975	1.03054	1.48633	1.24792	1.78136
0.704646	-0.0439853	0.841646	0.543105	0.586923	1.21406	0.75826	1.60399
0.923665	0.0495774	0.444127	0.532798	0.734315	0.357764	1.03191	1.30587
1.04496	-0.0751283	1.43463	1.58714	1.51963	1.40072	1.68558	1.72781
1.28822	-0.012221	1.08723	0.241859	1.44771	0.830635	1.75963	1.30325
0.837185	0.172392	1.17669	0.650062	0.877233	1.48732	0.941722	2.02817
1.23647	0.430445	1.53068	0.7544	0.52137	0.729671	0.70672	1.53942
DATA WAS MULTIPLIED BY 100 TO PRESENT DATA AS %ΔF/Fo

## Sheet: Control_MCH_CS+_(30s ISI)
MCH		OCT		PA		EL
Backwards	Forward	Backwards	Forward	Backwards	Forward	Backwards	Forward
0.633124	0.0136822	1.4476	0.457255	2.28274	0.682825	1.81705	0.688592
0.355273	0.0564371	0.492664	0.248368	0.763533	0.373121	0.815629	0.485667
0.535389	0.0774991	1.10009	0.831187	1.37043	0.897227	2.00519	1.10927
1.37185	0.122888	2.07998	0.682004	2.73875	0.665112	1.18765	0.789978
1.40567	0.833156	1.80101	1.15127	2.06611	1.08401	1.60524	1.3314
1.54106	0.144667	1.08735	0.466273	1.77772	1.24756	2.04955	2.25432
0.927437	-0.0939235	0.705861	0.526923	0.705702	1.28013	1.7457	0.601768
0.402797	0.111425	0.633948	0.855491	1.38171	1.53053	1.48023	1.37993
0.165435	0.0451964	0.496214	0.298924	0.842064	1.03691	0.756803	1.28827
0.503768	-0.00506901	0.699667	0.654888	0.643786	1.91071	0.954389	1.8424
DATA WAS MULTIPLIED BY 100 TO PRESENT DATA AS %ΔF/Fo

## Sheet: Control_MCH_CS+_(5min ISI)
MCH		OCT		PA		EL
Backwards	Forward	Backwards	Forward	Backwards	Forward	Backwards	Forward
0.803992	0.864586	0.219846	0.904579	0.798442	1.20096	0.945003	0.450199
1.36708	0.00621671	2.47658	1.01371	1.49516	0.805903	1.07073	0.615985
2.36341	0.0788969	1.7823	1.37182	2.50893	2.27509	1.73745	1.97948
0.226047	0.483816	0.561359	1.4383	0.901163	1.55756	0.379868	1.09965
0.793262	0.0728305	1.76559	0.389118	1.29761	1.30733	-0.145629	1.27335
2.12392	0.32275	1.13177	0.487354	1.49398	1.27189	2.12941	1.34538
0.534447	0.257828	0.989851	0.75357	1.19167	0.952142	1.98773	0.884566
0.821347	0.329069	1.38077	0.617396	1.69444	0.84014	1.39414	0.94986
1.64296		1.31776		1.00291		1.24729
1.88748		1.76982		1.05099		1.40749
DATA WAS MULTIPLIED BY 100 TO PRESENT DATA AS %ΔF/Fo

## Sheet: Rac1N17_MCH_CS+_(1s ISI)
MCH		OCT		PA		EL
Backwards	Forward	Backwards	Forward	Backwards	Forward	Backwards	Forward
0.589178	0.110557	0.779535	0.657343	0.701964	0.696978	1.85894	2.01101
0.854908	0.262384	1.03662	0.302175	0.896218	0.975155	2.16819	1.20923
0.279236	0.0939611	0.714637	0.514751	0.655491	0.517364	0.687852	1.77749
0.415059	0.0617188	1.47338	0.236907	1.31249	0.492382	2.41265	1.19535
0.432273	0.0302888	0.656385	0.355677	0.950145	0.229061	1.12438	1.46572
0.327807	0.0478577	0.662775	0.484025	1.46527	0.94382	1.35528	1.46569
0.332161	0.0772956	0.342755	0.0677856	0.501704	0.449964	0.632858	0.712931
0.478955	0.433595	0.534588	0.526401	0.858675	0.779276	1.08029	0.853385
0.59663		0.699649		0.907888		1.06292
1.18762		0.607296		0.428086		0.514636
DATA WAS MULTIPLIED BY 100 TO PRESENT DATA AS %ΔF/Fo

## Sheet: Rac1N17_MCH_CS+_(30s ISI)
MCH		OCT		PA		EL
Backwards	Forward	Backwards	Forward	Backwards	Forward	Backwards	Forward
0.177111	-0.0427442	0.636911	0.267708	0.264145	0.569549	0.555283	0.312679
0.129153	0.0725343	0.276419	0.110045	0.587857	1.05773	0.553457	1.43261
1.65084	-0.0791953	1.61769	0.0976617	0.499232	0.707261	1.44428	1.0526
1.17274	-0.0843426	1.87505	0.137153	1.50243	0.585083	2.05052	1.29365
0.749668	0.0574858	0.808326	0.607679	0.961169	0.948699	1.42621	0.154881
0.666353	0.437401	0.903072	0.47974	1.47845	0.606393	1.14024	1.33859
0.947637	0.111103	0.882979	0.564431	1.93566	0.676213	1.37452	0.676211
0.631696	0.236302	0.792766	0.216027	0.782657	0.444448	0.391954	2.38301
2.09592	-1.24744e-05	1.6725	0.192223	1.93263	0.615956	1.52206	0.447981
0.664238	0.16429	0.794415	0.385328	0.874436	0.750745	1.07262	0.890168
1.01225	0.261166	0.750102	0.433952	1.30916	1.21344	1.25838	1.65952
	0.0379222						0.679337
DATA WAS MULTIPLIED BY 100 TO PRESENT DATA AS %ΔF/Fo

## Sheet: Rac1N17_MCH_CS+ (5min ISI)
MCH		OCT		PA		EL
Backwards	Forward	Backwards	Forward	Backwards	Forward	Backwards	Forward
0.889877	0.0502414	1.26604	0.482728	1.94094	1.57547	1.2304	1.62318
1.05202	0.107454	1.41599	0.642453	2.3792	1.69652	1.78404	0.998855
0.460123	0.118397	0.257116	0.524597	0.474834	0.640093	0.848575	1.55763
1.43726	0.393484	1.68667	1.84359	1.73697	2.45772	2.66297	1.35838
1.7695	0.0786815	1.56769	0.103132	1.29622	0.719977	1.63086	1.2354
0.397549	-0.0235019	0.961859	2.04134	1.82117	2.11894	1.7173	2.0001
0.899738	0.347935	1.22047	0.575287	1.80464	1.43488	1.6364	2.32348
0.718116	0.0404097	0.48851	0.522174	0.598773	0.631168	1.86658	1.22232
	-0.0226832		0.569811		0.79477		0.501546
DATA WAS MULTIPLIED BY 100 TO PRESENT DATA AS %ΔF/Fo
