# Supplementary material for: Higher-order unimodal olfactory sensory preconditioning in Drosophila
Source: eLife. 2022 Sep 21;11:e79107. doi: 10.7554/eLife.79107 (PMC9566850; doi:10.7554/eLife.79107)
Supplement: Figure 2—figure supplement 1—source data 1. [file elife-79107-fig2-figsupp1-data1.xlsx]

## Sheet: B_Mch (Normalized)
Control Normalized												Mean trials 1-3	Mean trials 8-10
93.3995	49.6543	97.4772	78.2333	100	91.5217	83.1808	77.7809	48.1647	66.3634			80.177	64.103
59.4876	65.1681	73.8158	98.2772	80.9011	100	73.4049	84.7815	87.997	48.4109			66.1572	73.7298
100	74.0679	21.8231	23.3664	40.2749	15.9879	6.40624	20.879	19.2682	6.22968			65.297	15.459
20.095	100	21.2441	24.1194	6.68735	6.19306	6.82655	-10.1887	18.424	10.6329			47.113	6.28939
100	33.6555	-9.76104	40.1605	0.975113	48.5941	40.833	-6.08752	25.7795	18.8546			41.2981	12.8489
-22.939	100	-46.3106	10.3017	42.2331	5.55562	38.0224	51.0633	-5.32177	42.1579			10.2501	29.2998
Control Raw											Average	51.7154	33.6216
0.899861	0.478396	0.939148	0.753741	0.963454	0.88177	0.801409	0.749383	0.464044	0.639381		SEM	10.0866	11.6403
0.773938	0.847841	0.960349	1.27859	1.05253	1.30101	0.955002	1.10301	1.14485	0.629829
1.10525	0.818636	0.2412	0.258257	0.445138	0.176707	0.070805	0.230765	0.212962	0.0688536
0.198021	0.985425	0.209344	0.237678	0.0658988	0.0610279	0.0672705	-0.100402	0.181555	0.104779
0.405862	0.136595	-0.0396163	0.162996	0.00395761	0.197225	0.165726	-0.0247069	0.104629	0.0765235
-0.0924363	0.402966	-0.186616	0.0415122	0.170185	0.0223872	0.153217	0.205768	-0.0214449	0.169882
RacN17 Normalized												Mean trials 1-3	Mean trials 8-10
100	36.3269	84.0389	44.1613	27.966	77.4681	67.9418	36.1308	16.8581	-3.29738			73.4553	16.5638
100	92.6809	28.4175	12.5941	31.9693	40.8102	23.7288	1.21253	4.74904	4.35536			73.6995	3.43898
44.6782	100	14.7356	21.961	1.53154	-5.41556	16.6089	1.69415	0.719463	0.303858			53.1379	0.905823
58.6237	100	39.0244	45.1466	18.8927	15.3844	15.1904	6.33558	5.13195	3.38011			65.8827	4.94921
100	43.6842	17.4067	30.9845	52.5684	3.23911	12.311	-0.0344107	-8.04766	27.8171			53.6969	6.57834
29.5711	100	24.8015	39.6424	26.8381	22.3219	29.9137	14.8712	22.6665	21.0113			51.4575	19.5163
RacN17 Raw											Average	61.8883	8.65876
1.75015	0.635776	1.47081	0.772891	0.489449	1.35581	1.18909	0.632345	0.295042	-0.0577092		SEM	4.2494	3.08664
0.805752	0.746779	0.228975	0.101477	0.257593	0.328829	0.191195	0.00977001	0.0382655	0.0350935
0.297855	0.666667	0.098237	0.146407	0.0102103	-0.0361037	0.110726	0.0112943	0.00479642	0.00202572
0.661437	1.12828	0.440303	0.509378	0.213161	0.173579	0.171389	0.0714828	0.0579026	0.0381369
0.437685	0.191199	0.0761866	0.135615	0.230084	0.0141771	0.0538835	-0.00015061	-0.0352234	0.121751
0.172221	0.582395	0.144443	0.230876	0.156304	0.130002	0.174216	0.0866093	0.132008	0.122369

## Sheet: B_Oct (Normalized)
Control Normalized
1st	2nd	3rd	4th	5th	6th	7th	8th	9th	10th			Mean trials 1-3	Mean trials 8-10
100	15.4659	-1.72037	2.39913	2.65078	3.58982	9.81129	-2.44311	-4.58795	7.48726			37.9152	0.152065
100	54.8943	23.5448	-9.50972	1.90588	3.82475	-3.00721	29.3556	39.193	5.38372			59.4797	24.6441
100	0.569127	2.2778	-4.60957	-0.146182	14.1244	20.8023	45.3936	16.9802	15.3329			34.2823	25.9022
100	18.7909	9.78183	19.3524	-2.66618	3.3539	4.61661	3.49072	5.16634	12.8571			42.8576	7.1714
100	94.4211	34.8107	47.3077	64.0377	27.2349	55.7584	65.0943	7.85305	33.7105			76.4106	35.5526
100	60.497	-13.0592	-32.8152	-57.0673	-50.8285	-50.7873	-63.6472	-41.9985	-68.4947			49.1459	-58.0468
Control Raw											Average	50.0152	5.89593
2.23644	0.345885	-0.038475	0.053655	0.0592831	0.0802841	0.219423	-0.0546386	-0.102607	0.167448		SEM	6.40889	13.8499
1.35662	0.744707	0.319414	-0.129011	0.0258555	0.0518873	-0.0407964	0.398244	0.5317	0.0730366
1.25476	0.00714116	0.0285808	-0.057839	-0.00183423	0.177227	0.261018	0.56958	0.21306	0.19239
1.02177	0.192	0.099948	0.197738	-0.0272423	0.0342692	0.0471713	0.0356672	0.0527883	0.131371
0.731803	0.690976	0.254746	0.346199	0.46863	0.199306	0.408042	0.476362	0.0574688	0.246694
0.42365	0.256295	-0.0553254	-0.139021	-0.241765	-0.215335	-0.21516	-0.269641	-0.177926	-0.290178
RacN17 Normalized												Mean trials 1-3	Mean trials 8-10
100	69.8269	6.45892	51.2722	30.6213	31.1542	52.9093	47.1256	52.672	38.972			58.7619	46.2565
100	24.8508	-0.305883	23.3956	0.809372	-6.5398	-2.92815	-12.9585	-15.4938	-12.7563			41.515	-13.7362
100	37.4294	2.97869	-0.987182	-10.8247	12.67	27.9265	5.04193	6.93617	3.38559			46.8027	5.12123
100	51.9766	66.9306	62.1475	49.1135	46.2573	17.4482	6.8142	8.09945	-0.0602668			72.9691	4.95113
100	43.3761	24.2765	-2.06345	-4.30817	-11.3583	5.40931	3.77836	9.22085	11.7094			55.8842	8.2362
68.4115	100	78.7864	54.9201	69.7137	34.6945	36.1761	46.1908	21.8635	2.93281			82.3993	23.6624
RacN17 Raw											Average	59.722	12.4152
1.20449	0.841055	0.0777968	0.617566	0.368829	0.375248	0.637286	0.567621	0.634427	0.469412		SEM	6.33456	8.33068
1.23283	0.306368	-0.00377101	0.288428	0.00997816	-0.0806245	-0.036099	-0.159756	-0.191012	-0.157263
0.49562	0.185508	0.014763	-0.00489268	-0.0536494	0.0627952	0.138409	0.0249888	0.0343771	0.0167797
1.03016	0.535441	0.689491	0.640217	0.505947	0.476523	0.179744	0.0701971	0.0834372	-0.000620844
0.590687	0.256217	0.143398	-0.0121885	-0.0254478	-0.067092	0.0319521	0.0223183	0.0544664	0.0691658
0.382351	0.558899	0.440336	0.306948	0.389629	0.193908	0.202188	0.25816	0.122195	0.0163914
