# Supplementary material for: Higher-order unimodal olfactory sensory preconditioning in Drosophila
Source: eLife. 2022 Sep 21;11:e79107. doi: 10.7554/eLife.79107 (PMC9566850; doi:10.7554/eLife.79107)
Supplement: Figure 2—source data 1. [file elife-79107-fig2-data1.xlsx]

## Sheet: Control_PA_CS+
MCH		OCT
Pre	Post	Pre	Post
1.04692	0.0394541	1.00463	0.989681
0.672829	0.0372419	1.03889	0.593827
1.91246	0.543532	0.717349	0.78873
2.63152	0.75271	0.726941	1.13241
2.31214	2.36688	1.73353	2.51684
2.4617	0.047073	1.12756	1.95557
1.73478	0.760209	1.82479	2.46329
2.08888	0.165363	1.61631	0.754352
2.13178	0.105555	1.69354	0.880988
0.811721	0.210331	0.323567	0.453995
1.25206	0.371228	0.423364	0.879289
DATA WAS MULTIPLIED BY 100 TO PRESENT DATA AS %ΔF/Fo

## Sheet: Rac1N17_PA_CS+
MCH		OCT
Pre	Post	Pre	Post
1.69306	0.0935523	0.618901	0.599018
2.20307	0.736912	1.70605	0.954978
1.25466	0.0238772	2.08309	0.353398
1.81795	0.0162762	1.08847	0.618949
0.708565	0.0149827	0.271657	0.51707
1.12654	-0.00644474	0.492332	0.256845
1.12541	-0.0326743	0.537453	0.1564
1.12323	0.143432	1.42312	0.23249
DATA WAS MULTIPLIED BY 100 TO PRESENT DATA AS %ΔF/Fo
