# Supplementary material for: Higher-order unimodal olfactory sensory preconditioning in Drosophila
Source: eLife. 2022 Sep 21;11:e79107. doi: 10.7554/eLife.79107 (PMC9566850; doi:10.7554/eLife.79107)
Supplement: Figure 3—source data 1. [file elife-79107-fig3-data1.xlsx]

## Sheet: Control_MCH_CS+_(No Pre)
MCH		OCT		PA		EL
Backwards	Forward	Backwards	Forward	Backwards	Forward	Backwards	Forward
1.56966	0.474016	1.69408	1.82542	0.857666	1.02196	1.60481	1.70845
0.611068	0.504746	0.879975	1.46732	0.808931	1.4865	1.03441	1.16438
0.909856	1.01868	0.884432	1.60907	0.670557	0.704008	0.775914	0.556354
0.518712	0.00494146	0.405529	1.33404	1.50724	1.70067	0.918623	1.60707
0.875722	0.155387	1.60933	1.49214	1.67801	1.83183	1.75495	1.21624
0.864774	0.0645654	1.31921	0.585024	0.84757	0.999209	1.1713	1.58546
1.41446	0.611512	1.0763	0.581206	1.77231	0.81226	1.44761	1.19988
1.87441	1.09095	1.89762	2.16275	1.77278	1.95391	1.25602	2.07635
0.887644	-0.0433669	1.67618	2.06749	2.21696	1.42973	1.38596	1.7458
0.991081	0.858028	1.01689	1.11064	0.980461	1.80788	1.54119	2.09314
DATA WAS MULTIPLIED BY 100 TO PRESENT DATA AS %ΔF/Fo

## Sheet: Rac1N17_MCH_CS+_(No Pre)
MCH		OCT		PA		EL
Backwards	Forward	Backwards	Forward	Backwards	Forward	Backwards	Forward
0.2343	0.0112768	0.104265	1.62297	0.207957	2.15233	1.11345	1.52308
0.470679	0.0309714	1.04062	0.348975	1.88953	0.698344	2.17278	0.463005
0.500363	0.218896	0.559201	0.548752	0.910293	0.583472	0.642525	0.561357
1.47091	0.156911	1.47326	1.00822	1.54007	0.762619	1.64277	1.17152
0.558358	0.0521945	0.882459	0.0295369	1.30897	0.515633	0.54228	0.500361
0.560792	0.106156	0.87535	0.716422	0.929141	0.846957	0.543047	0.551471
2.40911	0.276197	1.6491	1.6035	2.13246	1.22311	1.28294	0.536006
0.285697	0.216622	1.1539	0.717033	0.722813	0.571227	1.16844	0.675706
0.594591	0.123405	1.36012	0.89114	0.703811	1.09388	1.33772	0.900227
0.74199	0.152184	1.12414	0.900131	1.19512	0.161856	0.551585	0.221007
1.11127		0.7137		1.21591		1.0251
DATA WAS MULTIPLIED BY 100 TO PRESENT DATA AS %ΔF/Fo
