# Supplementary material for: Higher-order unimodal olfactory sensory preconditioning in Drosophila
Source: eLife. 2022 Sep 21;11:e79107. doi: 10.7554/eLife.79107 (PMC9566850; doi:10.7554/eLife.79107)
Supplement: Figure 4—figure supplement 1—source data 1. [file elife-79107-fig4-figsupp1-data1.xlsx]

## Sheet: Behavior 1X
S1 vs NO		S2 vs NO
Backwards	Forward	Backwards	Forward
0.22	0.86	0.03	0.13
0.07	0.77	0.04	0.14
-0.03	0.78	0.16	0.23
-0.05	0.63	-0.1	-0.04
0.1	0.59	-0.04	0.18
0.12	0.78	-0.03	0.06
0.04	0.77	-0.05	0.06
0.07	0.64	0.13	0.08
-0.04	0.82	0.08	-0.07
		0.03	0.25
