# Supplementary material for: Higher-order unimodal olfactory sensory preconditioning in Drosophila
Source: eLife. 2022 Sep 21;11:e79107. doi: 10.7554/eLife.79107 (PMC9566850; doi:10.7554/eLife.79107)
Supplement: Figure 4—figure supplement 2—source data 1. [file elife-79107-fig4-figsupp2-data1.xlsx]

## Sheet: Control_MCH_CS+_X10_(1s ISI)
MCH		OCT		PA		EL
Backwards	Forward	Backwards	Forward	Backwards	Forward	Backwards	Forward
1.06259	0.0522589	0.579384	0.0528103	0.57755	0.703382	0.947875	0.868667
0.581739	0.166849	0.779066	0.770852	1.07859	0.826363	0.970696	1.45653
1.33381	0.00909632	0.930088	0.151749	1.78173	0.624877	1.60566	0.959742
1.83293	0.356161	1.15544	0.403021	2.06397	1.33859	1.76606	1.82152
1.00646	0.0412667	0.791431	0.343013	1.32936	0.828154	1.14191	1.94253
	-0.00160175		0.391132		1.02094		2.03789
DATA WAS MULTIPLIED BY 100 TO PRESENT DATA AS %ΔF/Fo

## Sheet: Control_PA_CS+_X10_(1s ISI)
MCH		OCT		PA		EL
Backwards	Forward	Backwards	Forward	Backwards	Forward	Backwards	Forward
0.594603	0.604232	0.321728	0.232988	0.931067	0.0822193	0.557716	0.00988442
1.19168	0.444763	0.766253	0.349214	0.340322	0.0218482	0.318066	0.434493
0.43454	0.468765	0.320473	0.374762	0.337689	0.169155	0.580125	0.411207
1.67025	1.4187	0.854306	0.218744	0.776073	0.100262	0.694351	0.238131
0.853341	0.600411	0.530733	0.541378	0.592752	0.228673	0.585169	0.178804
0.130137	0.442055	0.165595	0.447364	0.19964	0.41097	0.249613	0.131457
0.442734	1.91386	0.58967	0.657605	0.778394	0.363942	1.00162	0.0679467
0.559104	0.808602	0.536898	0.404168	0.678534	0.080862	0.805469	0.224203
DATA WAS MULTIPLIED BY 100 TO PRESENT DATA AS %ΔF/Fo
