# Supplementary material for: Higher-order unimodal olfactory sensory preconditioning in Drosophila
Source: eLife. 2022 Sep 21;11:e79107. doi: 10.7554/eLife.79107 (PMC9566850; doi:10.7554/eLife.79107)
Supplement: Figure 4—figure supplement 3—source data 1. [file elife-79107-fig4-figsupp3-data1.xlsx]

## Sheet: Behavior Control_10X_30sISI_18C
S1 vs NO		S2 vs NO
Backwards	Forward	Backwards	Forward
-0.08	0.59	0.04	0.02
-0.11	0.72	0.02	-0.08
-0.18	0.67	0.11	-0.11
-0.04	0.49	-0.04	0.21
0.04	0.81	-0.03	0.08
0.08	0.59	0.15	0.15
-0.21	0.66	0.11	-0.04
-0.17	0.72	0.08	-0.01

## Sheet: Behavior Rac1N17_10X_30sISI_18C
S1 vs NO		S2 vs NO
Backwards	Forward	Backwards	Forward
-0.04	0.67	0.02	0.11
-0.14	0.48	0.14	-0.09
-0.18	0.58	0.11	0.06
0.04	0.49	-0.04	0.11
-0.02	0.79	0.18	0.18
-0.15	0.68	0.13	-0.04
-0.21	0.72	-0.03	0.02
0.02	0.57	-0.02	0.06
