# Supplementary material for: Higher-order unimodal olfactory sensory preconditioning in Drosophila
Source: eLife. 2022 Sep 21;11:e79107. doi: 10.7554/eLife.79107 (PMC9566850; doi:10.7554/eLife.79107)
Supplement: Figure 4—figure supplement 4—source data 1. [file elife-79107-fig4-figsupp4-data1.xlsx]

## Sheet: Control vs Rac1N17_KC
MCH		OCT
Control	Rac1N17	Control	Rac1
0.076162	0.134745	0.132522	0.133728
0.217464	0.086163	0.44744	0.103835
0.131648	0.128831	0.146466	0.183312
0.133372	0.143841	0.139945	0.10598
0.090685	0.085185	0.25233	0.152409
0.128173	0.042106	0.043927	0.12319
0.242742	0.083051	0.256849	0.074604
0.032971	0.194968	0.068942	0.185171
0.122533	0.210834	0.200719	0.278201
0.023801	0.144856	0.2457	0.200783
0.05893	0.199024	0.116577	0.269979
0.072507	0.096609	0.144326	0.232904
0.175742	0.124545	0.372245	0.230024
0.208116		0.309493
DATA WAS MULTIPLIED BY 100 TO PRESENT DATA AS %ΔF/Fo
