# Supplementary material for: Higher-order unimodal olfactory sensory preconditioning in Drosophila
Source: eLife. 2022 Sep 21;11:e79107. doi: 10.7554/eLife.79107 (PMC9566850; doi:10.7554/eLife.79107)
Supplement: Figure 4—source data 1. [file elife-79107-fig4-data1.xlsx]

## Sheet: Behavior Control_10X_1s ISI
S1 vs NO		S2 vs NO
Backwards	Forward	Backwards	Forward
0.12	0.63	0.21	0.08
0.23	0.53	0.1	-0.1
0.02	0.46	0.16	-0.08
-0.02	0.9	0.32	0.05
-0.23	0.83	0.24	0.15
-0.1	0.73	0.29	0.03
0.05	0.67	0.02	-0.12
0.03	0.59	-0.05	0.06
0.09	0.63	0.15	0.12
-0.03	0.58	0.31	-0.03
-0.11	0.8	0.11	0.05
0.03	0.77	0.18	-0.01

## Sheet: Behavior Control_10X_30s ISI
S1 vs NO		S2 vs NO
Backwards	Forward	Backwards	Forward
0.02	0.67	0.03	0.12
-0.1	0.82	0.05	0.19
-0.14	0.56	0.12	0.04
-0.04	0.49	-0.05	0.02
-0.28	0.77	-0.03	-0.05
-0.1	0.82	0.15	0.04
0.11	0.68	0.08	0.11
0.03	0.78	0.04	-0.01

## Sheet: Behavior Control_10X_5min ISI
S1 vs NO		S2 vs NO
Backwards	Forward	Backwards	Forward
-0.18	0.56	0.05	0.03
-0.12	0.81	0.12	-0.01
-0.08	0.59	0.08	-0.08
0.02	0.67	0.03	0.11
-0.04	0.77	-0.05	0.14
-0.11	0.72	0.11	-0.03
-0.12	0.68	-0.08	0.01
0.04	0.58	-0.04	-0.05

## Sheet: Behavior Rac1N17_10X_30s ISI
S1 vs NO		S2 vs NO
Backwards	Forward	Backwards	Forward
-0.12	0.67	0.03	0.12
-0.24	0.64	0.04	0.21
0.03	0.8	-0.07	0.06
0.05	0.77	-0.02	0.08
-0.09	0.58	0.15	0.19
-0.12	0.75	0.18	0.24
-0.03	0.69	-0.08	0.14
0.03	0.59	0.04	0.1

## Sheet: Behavior Rac1N17_10X_5min ISI
S1 vs NO		S2 vs NO
Backwards	Forward	Backwards	Forward
-0.08	0.64	0.03	0.04
-0.03	0.58	0.11	-0.01
0.05	0.77	0.12	0.05
-0.21	0.58	0.04	-0.08
-0.18	0.47	0.02	0.03
-0.11	0.69	-0.11	0.12
0.04	0.77	-0.08	-0.08
-0.3	0.74	0.03	0.04
